# Supplementary material
Source: Springer Nature journal article supplement (https://www.springermedizin.de/resource/supplementary/12882_2013_540_MOESM2_ESM.pdf/9453780)
Supplement: MOESM2 [file 9453780]

**N=116**

```
graph TD; A["N=116"] --> B["Transplanted within 1 year  
N=2 (2%)"]; A --> C["Started PD within 1 year  
N=2 (2%)"]; B <--> C; B --> D["HD within 1 year  
N=57 (49%)"]; C --> E["No HD within 1 year  
N=55 (47%)"];
```

**Transplanted  
within 1 year**

**N=2 (2%)**

**Started PD  
within 1 year**

**N=2 (2%)**

**HD within  
1 year**

**N=57 (49%)**

**No HD within  
1 year**

**N=55 (47%)**
